# Supplementary material for: Uveal melanoma-associated cancers revisited
Source: PubMed Central journal article supplement — ESMO Open. 2020 Nov 30;5(6):e000990. doi: 10.1136/esmoopen-2020-000990 (PMC7705551; doi:10.1136/esmoopen-2020-000990), 2020-11-30
Supplement: esmoopen-2020-000990supp001.pdf [file esmoopen-2020-000990supp001.pdf]

## Supplementary Data:

### Supplementary Figures:

#### Supplementary Figures:

doi: 10.5281/zenodo.3959839

**Supplementary Figure 1.** Cancer-specific Survival of Uveal Melanoma Patients by Diagnosis Era (A, C, D, E) and Tumor Stage (B, F,G,H)

### Supplementary tables:

doi: 10.5281/zenodo.3959846

Standardized incidence Ratios for developing a second malignancy after First Primary Uveal Melanoma -  
- for age groups:

younger than 50 years old, **Supplementary table 1**

patients 50-70 years old, **Supplementary table 2**

patients older than 70 years old, **Supplementary table 3**

- in white patients, **Supplementary table 4.**

doi: 10.5281/zenodo.3959843

Standardized incidence ratios for developing a primary uveal melanoma following another primary malignancy -

- for age groups:

younger than 50 years old, **Supplementary table 5**

patients 50-70 years old, **Supplementary table 6**

patients older than 70 years old, **Supplementary table 7**

- in white patients, **Supplementary Table 8**

**The following tables have no DOI**

**Supplementary Table 9, a complementary to table 4**

**Supplementary Table 10, a complementary to table 5**

Supplementary table 1. Standardized incidence Ratios for developing a second malignancy after First Primary Uveal Melanoma in patients younger than 50 years old; SIR (95% confidence intervals)

| Characteristics                                    | < 5 years |                      | 5-10 years |                      | > 10 years |                     | Total |                     |
|----------------------------------------------------|-----------|----------------------|------------|----------------------|------------|---------------------|-------|---------------------|
|                                                    | Obs.      | SIR<br>(95% CI)      | Obs.       | SIR<br>(95% CI)      | Obs.       | SIR<br>(95% CI)     | Obs.  | SIR<br>(95% CI)     |
| Overall                                            | 15        | 1.36<br>(0.76-2.24)  | 20         | 1.41<br>(0.86-2.17)  | 69         | 0.97<br>(0.75-1.23) | 104   | 1.08<br>(0.88-1.31) |
| <b>Sex</b>                                         |           |                      |            |                      |            |                     |       |                     |
| Male                                               | 8         | 1.49<br>(0.64-2.93)  | 10         | 1.29<br>(0.62-2.38)  | 40         | 0.87<br>(0.62-1.19) | 58    | 0.98<br>(0.75-1.27) |
| Female                                             | 7         | 1.24<br>(0.50-2.56)  | 10         | 1.55<br>(0.74-2.84)  | 29         | 1.15<br>(0.77-1.65) | 46    | 1.23<br>(0.90-1.64) |
| <b>Race</b>                                        |           |                      |            |                      |            |                     |       |                     |
| White                                              | 15        | 1.41<br>(0.79-2.33)  | 20         | 1.46<br>(0.89-2.26)  | 68         | 0.98<br>(0.76-1.24) | 103   | 1.10<br>(0.90-1.33) |
| Black                                              | 0         | 0                    | 0          | 0                    | 1          | 1.70<br>(0.04-9.46) | 1     | 1.22<br>(0.03-6.82) |
| Other races                                        | 0         | 0                    | 0          | 0                    | 0          | 0                   | 0     | 0                   |
| <b>Primary site of uveal melanoma <sup>a</sup></b> |           |                      |            |                      |            |                     |       |                     |
| Choroid                                            | 13        | 1.46<br>(0.78-2.50)  | 13         | 1.15<br>(0.61-1.96)  | 49         | 0.93<br>(0.68-1.22) | 75    | 1.03<br>(0.81-1.29) |
| Ciliary body                                       | 2         | 0.93<br>(0.11-3.36)  | 7          | 2.43<br>(0.98-5.01)  | 20         | 1.10<br>(0.67-1.70) | 29    | 1.25<br>(0.84-1.79) |
| <b>Histology of uveal melanoma <sup>b</sup></b>    |           |                      |            |                      |            |                     |       |                     |
| 8720/3: Malignant melanoma, NOS                    | 9         | 1.34<br>(0.61-2.55)  | 8          | 0.98<br>(0.42-1.92)  | 42         | 1.12<br>(0.81-1.51) | 59    | 1.13<br>(0.86-1.45) |
| 8730/3: Amelanotic                                 | 0         | 0                    | 0          | 0                    | 1          | 1.63<br>(0.04-9.10) | 1     | 1.12<br>(0.03-6.27) |
| 8743/3: Superficial spreading                      | 0         | 0                    | 0          | 0                    | 0          | 0                   | 0     | 0                   |
| 8770/3: Mixed epithelioid and spindle cell         | 2         | 1.65<br>(0.20-5.95)  | 2          | 1.22<br>(0.15-4.39)  | 8          | 1.06<br>(0.46-2.09) | 12    | 1.15<br>(0.60-2.02) |
| 8771/3: Epithelioid                                | 1         | 3.31<br>(0.08-18.45) | 0          | 0                    | 1          | 0.64<br>(0.02-3.55) | 2     | 0.90<br>(0.11-3.25) |
| 8772-8774/3: Spindle cell                          | 3         | 1.12<br>(0.23-3.28)  | 10         | 2.61#<br>(1.25-4.80) | 17         | 0.71<br>(0.42-1.14) | 30    | 0.99<br>(0.67-1.41) |
| <b>Radiotherapy for uveal melanoma</b>             |           |                      |            |                      |            |                     |       |                     |
| Yes                                                | 6         | 1.29<br>(0.48-2.82)  | 3          | 0.57<br>(0.12-1.67)  | 19         | 1.31<br>(0.79-2.05) | 28    | 1.15<br>(0.76-1.66) |
| <b>Site of the next malignancy <sup>c</sup></b>    |           |                      |            |                      |            |                     |       |                     |
| Breast                                             | 2         | 0.87<br>(0.10-3.13)  | 1          | 0.39<br>(0.01-2.16)  | 10         | 1.13<br>(0.54-2.08) | 13    | 0.95<br>(0.50-1.62) |

|                         |   |              |   |               |    |              |    |              |
|-------------------------|---|--------------|---|---------------|----|--------------|----|--------------|
| Prostate                | 0 | 0            | 1 | 0.63          | 9  | 0.62         | 10 | 0.60         |
|                         |   |              |   | (0.02-3.49)   |    | (0.28-1.18)  |    | (0.29-1.10)  |
| Colon and rectum        | 2 | 2.24         | 1 | 0.82          | 4  | 0.66         | 7  | 0.86         |
|                         |   | (0.27-8.10)  |   | (0.02-4.54)   |    | (0.18-1.70)  |    | (0.34-1.77)  |
| Lung and bronchus       | 2 | 2.10         | 2 | 1.37          | 11 | 1.18         | 15 | 1.28         |
|                         |   | (0.25-7.58)  |   | (0.17-4.95)   |    | (0.59-2.11)  |    | (0.71-2.11)  |
| Urinary bladder         | 0 | 0            | 1 | 2.04          | 4  | 1.12         | 5  | 1.14         |
|                         |   |              |   | (0.05-11.39)  |    | (0.31-2.88)  |    | (0.37-2.67)  |
| Melanoma of the skin    | 4 | 4.30#        | 4 | 4.03#         | 6  | 1.57         | 14 | 2.43#        |
|                         |   | (1.17-11.00) |   | (1.10-10.31)  |    | (0.58-3.41)  |    | (1.33-4.09)  |
| Corpus uteri            | 0 | 0            | 1 | 2.13          | 3  | 1.57         | 4  | 1.47         |
|                         |   |              |   | (0.05-11.89)  |    | (0.32-4.58)  |    | (0.40-3.76)  |
| Non-Hodgkin lymphoma    | 1 | 1.87         | 1 | 1.57          | 0  | 0            | 2  | 0.48         |
|                         |   | (0.05-10.41) |   | (0.04-8.73)   |    |              |    | (0.06-1.75)  |
| Oral cavity and pharynx | 0 | 0            | 0 | 0             | 1  | 0.49         | 1  | 0.34         |
|                         |   |              |   |               |    | (0.01-2.72)  |    | (0.01-1.87)  |
| Thyroid                 | 0 | 0            | 1 | 2.06          | 2  | 1.53         | 3  | 1.30         |
|                         |   |              |   | (0.05-11.48)  |    | (0.19-5.54)  |    | (0.27-3.80)  |
| Ovary                   | 0 | 0            | 0 | 0             | 4  | 4.71#        | 4  | 3.01         |
|                         |   |              |   |               |    | (1.28-12.06) |    | (0.82-7.72)  |
| Leukemia                | 0 | 0            | 1 | 2.89          | 3  | 1.61         | 4  | 1.61         |
|                         |   |              |   | (0.07-16.09)  |    | (0.33-4.71)  |    | (0.44-4.11)  |
| Kidney and renal pelvis | 1 | 2.79         | 0 | 0             | 1  | 0.42         | 2  | 0.63         |
|                         |   | (0.07-15.55) |   |               |    | (0.01-2.37)  |    | (0.08-2.26)  |
| Eye and orbit           | 0 | 0            | 1 | 29.48         | 3  | 22.01#       | 4  | 20.2#        |
|                         |   |              |   | (0.75-164.24) |    | (4.54-64.32) |    | (5.45-51.25) |

Acronyms: Obs., Observed; #, significant with P value less than .05; a, using primary site variable, b, using ICD-O-3 histology recode; c, using ICD-O-3 site recode

Supplementary table 2. Standardized incidence Ratios for developing a second malignancy after First Primary Uveal Melanoma in patients 50-70 years old; SIR (95% confidence intervals)

| Characteristics                                    | < 5 years |                      | 5-10 years |                      | > 10 years |                      | Total |                      |
|----------------------------------------------------|-----------|----------------------|------------|----------------------|------------|----------------------|-------|----------------------|
|                                                    | Obs.      | SIR (95% CI)         | Obs.       | SIR (95% CI)         | Obs.       | SIR (95% CI)         | Obs.  | SIR (95% CI)         |
| Overall                                            | 133       | 1.24#<br>(1.04-1.47) | 113        | 1.15<br>(0.94-1.38)  | 182        | 1.01<br>(0.87-1.17)  | 428   | 1.11#<br>(1.01-1.22) |
| <b>Sex</b>                                         |           |                      |            |                      |            |                      |       |                      |
| Male                                               | 80        | 1.24<br>(0.98-1.54)  | 77         | 1.25<br>(0.99-1.56)  | 105        | 0.97<br>(0.79-1.17)  | 262   | 1.11<br>(0.98-1.26)  |
| Female                                             | 53        | 1.25<br>(0.93-1.63)  | 36         | 0.97<br>(0.68-1.34)  | 77         | 1.09<br>(0.86-1.36)  | 166   | 1.10<br>(0.94-1.28)  |
| <b>Race</b>                                        |           |                      |            |                      |            |                      |       |                      |
| White                                              | 132       | 1.25#<br>(1.05-1.48) | 112        | 1.15<br>(0.95-1.39)  | 179        | 1.02<br>(0.87-1.18)  | 423   | 1.12#<br>(1.01-1.23) |
| Black                                              | 1         | 1.43<br>(0.04-7.97)  | 1          | 2.17<br>(0.05-12.10) | 3          | 1.77<br>(0.36-5.16)  | 5     | 1.75<br>(0.57-4.08)  |
| Other races                                        | 0         | 0                    | 0          | 0                    | 0          | 0                    | 0     | 0                    |
| <b>Primary site of uveal melanoma <sup>a</sup></b> |           |                      |            |                      |            |                      |       |                      |
| Choroid                                            | 111       | 1.23#<br>(1.01-1.48) | 90         | 1.12<br>(0.90-1.37)  | 141        | 1.02<br>(0.86-1.20)  | 342   | 1.11<br>(0.99-1.23)  |
| Ciliary body                                       | 22        | 1.29<br>(0.81-1.96)  | 23         | 1.27<br>(0.81-1.91)  | 41         | 0.99<br>(0.71-1.35)  | 86    | 1.13<br>(0.90-1.39)  |
| <b>Histology of uveal melanoma <sup>b</sup></b>    |           |                      |            |                      |            |                      |       |                      |
| 8720/3: Malignant melanoma, NOS                    | 85        | 1.22<br>(0.98-1.51)  | 71         | 1.16<br>(0.91-1.47)  | 113        | 1.06<br>(0.87-1.27)  | 269   | 1.13#<br>(1.00-1.28) |
| 8730/3: Amelanotic                                 | 2         | 2.16<br>(0.26-7.81)  | 2          | 2.54<br>(0.31-9.16)  | 1          | 2.32<br>(0.06-12.90) | 5     | 2.33<br>(0.76-5.44)  |
| 8743/3: Superficial spreading                      | 0         | 0                    | 0          | 0                    | 0          | 0                    | 0     | 0                    |
| 8770/3: Mixed epithelioid and spindle cell         | 20        | 1.59<br>(0.97-2.45)  | 8          | 0.68<br>(0.30-1.35)  | 26         | 1.20<br>(0.78-1.76)  | 54    | 1.17<br>(0.88-1.53)  |
| 8771/3: Epithelioid                                | 3         | 0.61<br>(0.13-1.80)  | 4          | 1.14<br>(0.31-2.93)  | 5          | 0.87<br>(0.28-2.03)  | 12    | 0.85<br>(0.44-1.49)  |
| 8772-8774/3: Spindle cell                          | 23        | 1.20<br>(0.76-1.80)  | 28         | 1.29<br>(0.86-1.86)  | 37         | 0.82<br>(0.58-1.14)  | 88    | 1.03<br>(0.82-1.26)  |
| <b>Radiotherapy for uveal melanoma</b>             |           |                      |            |                      |            |                      |       |                      |
| Yes                                                | 55        | 1.15<br>(0.87-1.50)  | 51         | 1.31<br>(0.98-1.73)  | 41         | 0.90<br>(0.65-1.23)  | 147   | 1.12<br>(0.94-1.31)  |
| <b>Site of the next malignancy <sup>c</sup></b>    |           |                      |            |                      |            |                      |       |                      |
| Breast                                             | 13        | 0.96<br>(0.51-1.64)  | 13         | 1.16<br>(0.62-1.98)  | 18         | 0.98<br>(0.58-1.55)  | 44    | 1.02<br>(0.74-1.37)  |
| Prostate                                           | 29        | 1.43                 | 22         | 1.09                 | 32         | 0.99                 | 83    | 1.14                 |

|                         |    |              |    |              |    |              |    |              |
|-------------------------|----|--------------|----|--------------|----|--------------|----|--------------|
|                         |    | (0.96-2.06)  |    | (0.69-1.66)  |    | (0.68-1.40)  |    | (0.91-1.42)  |
| Colon and rectum        | 15 | 1.35         | 6  | 0.57         | 19 | 0.89         | 40 | 0.93         |
|                         |    | (0.75-2.22)  |    | (0.21-1.24)  |    | (0.54-1.40)  |    | (0.67-1.27)  |
| Lung and bronchus       | 11 | 0.67         | 20 | 1.28         | 32 | 1.11         | 63 | 1.04         |
|                         |    | (0.33-1.20)  |    | (0.78-1.98)  |    | (0.76-1.57)  |    | (0.80-1.33)  |
| Urinary bladder         | 5  | 0.94         | 4  | 0.74         | 9  | 0.76         | 18 | 0.80         |
|                         |    | (0.31-2.20)  |    | (0.20-1.90)  |    | (0.35-1.44)  |    | (0.47-1.26)  |
| Melanoma of the skin    | 15 | 3.73#        | 6  | 1.70         | 13 | 1.93#        | 34 | 2.38#        |
|                         |    | (2.08-6.14)  |    | (0.62-3.70)  |    | (1.03-3.29)  |    | (1.65-3.32)  |
| Corpus uteri            | 2  | 0.56         | 3  | 1.11         | 6  | 1.63         | 11 | 1.10         |
|                         |    | (0.07-2.02)  |    | (0.23-3.24)  |    | (0.60-3.55)  |    | (0.55-1.98)  |
| Non-Hodgkin lymphoma    | 4  | 1.02         | 2  | 0.54         | 9  | 1.16         | 15 | 0.97         |
|                         |    | (0.28-2.61)  |    | (0.07-1.94)  |    | (0.53-2.20)  |    | (0.55-1.61)  |
| Oral cavity and pharynx | 3  | 0.95         | 3  | 1.19         | 2  | 0.54         | 8  | 0.85         |
|                         |    | (0.20-2.76)  |    | (0.25-3.48)  |    | (0.07-7.94)  |    | (0.37-1.68)  |
| Thyroid                 | 5  | 4.11#        | 0  | 0            | 1  | 0.86         | 6  | 1.83         |
|                         |    | (1.33-9.59)  |    |              |    | (0.02-4.80)  |    | (0.67-3.99)  |
| Ovary                   | 2  | 1.29         | 1  | 0.80         | 2  | 0.94         | 5  | 1.02         |
|                         |    | (0.16-4.67)  |    | (0.02-4.45)  |    | (0.11-3.40)  |    | (0.33-2.37)  |
| Leukemia                | 2  | 0.76         | 3  | 1.16         | 8  | 1.42         | 13 | 1.20         |
|                         |    | (0.09-2.73)  |    | (0.24-3.40)  |    | (0.61-2.79)  |    | (0.64-2.04)  |
| Kidney and renal pelvis | 8  | 2.63#        | 5  | 1.84         | 9  | 1.89         | 22 | 2.09#        |
|                         |    | (1.14-5.18)  |    | (0.60-4.28)  |    | (0.87-3.60)  |    | (1.31-3.17)  |
| Eye and orbit           | 1  | 5.05         | 1  | 6.07         | 2  | 7.17         | 4  | 6.23#        |
|                         |    | (0.13-28.16) |    | (0.15-33.84) |    | (0.87-25.89) |    | (1.70-15.96) |

Acronyms: Obs., Observed; #, significant with P value less than .05; a, using primary site variable, b, using ICD-O-3 histology recode; c, using ICD-O-3 site recode

Supplementary table 3. Standardized incidence Ratios for developing a second malignancy after First Primary Uveal Melanoma in patients 70 years old or older; SIR (95% confidence intervals)

| Characteristics                             | < 5 years |                      | 5-10 years |                     | > 10 years |                     | Total |                      |
|---------------------------------------------|-----------|----------------------|------------|---------------------|------------|---------------------|-------|----------------------|
|                                             | Obs.      | SIR (95% CI)         | Obs.       | SIR (95% CI)        | Obs.       | SIR (95% CI)        | Obs.  | SIR (95% CI)         |
| Overall                                     | 110       | 1.13<br>(0.93-1.37)  | 48         | 0.91<br>(0.67-1.21) | 36         | 1.10<br>(0.77-1.52) | 194   | 1.06<br>(0.92-1.22)  |
| Sex                                         |           |                      |            |                     |            |                     |       |                      |
| Male                                        | 65        | 1.11<br>(0.86-1.41)  | 29         | 0.93<br>(0.62-1.33) | 24         | 1.21<br>(0.78-1.80) | 118   | 1.08<br>(0.89-1.29)  |
| Female                                      | 45        | 1.17<br>(0.85-1.56)  | 19         | 0.89<br>(0.54-1.40) | 12         | 0.93<br>(0.48-1.62) | 76    | 1.05<br>(0.82-1.31)  |
| Race                                        |           |                      |            |                     |            |                     |       |                      |
| White                                       | 109       | 1.14<br>(0.93-1.37)  | 48         | 0.92<br>(0.68-1.22) | 36         | 1.11<br>(0.78-1.54) | 193   | 1.07<br>(0.92-1.23)  |
| Black                                       | 0         | 0                    | 0          | 0                   | 0          | 0                   | 0     | 0                    |
| Other races                                 | 1         | 2.85<br>(0.07-15.90) | 0          | 0                   | 0          | 0                   | 1     | 1.96<br>(0.05-10.93) |
| Primary site of uveal melanoma <sup>a</sup> |           |                      |            |                     |            |                     |       |                      |
| Choroid                                     | 93        | 1.13<br>(0.91-1.38)  | 37         | 0.83<br>(0.58-1.14) | 30         | 1.09<br>(0.73-1.55) | 160   | 1.04<br>(0.88-1.21)  |
| Ciliary body                                | 17        | 1.15<br>(0.67-1.85)  | 11         | 1.39<br>(0.69-2.48) | 6          | 1.15<br>(0.42-2.50) | 34    | 1.22<br>(0.84-1.70)  |
| Histology of uveal melanoma <sup>b</sup>    |           |                      |            |                     |            |                     |       |                      |
| 8720/3: Malignant melanoma, NOS             | 67        | 1.05<br>(0.82-1.34)  | 32         | 0.97<br>(0.66-1.36) | 22         | 1.17<br>(0.73-1.77) | 121   | 1.05<br>(0.87-1.25)  |
| 8730/3: Amelanotic                          | 0         | 0                    | 0          | 0                   | 0          | 0                   | 0     | 0                    |
| 8743/3: Superficial spreading               | 1         | 7.18<br>(0.18-40.01) | 0          | 0                   | 0          | 0                   | 1     | 1.93<br>(0.05-10.77) |
| 8770/3: Mixed epithelioid and spindle cell  | 20        | 1.74#<br>(1.06-2.69) | 3          | 0.60<br>(0.12-1.75) | 8          | 1.85<br>(0.80-3.64) | 31    | 1.49#<br>(1.01-2.11) |
| 8771/3: Epithelioid                         | 3         | 0.69<br>(0.14-2.02)  | 0          | 0                   | 1          | 0.58<br>(0.01-3.24) | 4     | 0.49<br>(0.13-1.26)  |
| 8772-8774/3: Spindle cell                   | 19        | 1.11<br>(0.67-1.73)  | 13         | 1.09<br>(0.58-1.86) | 5          | 0.68<br>(0.22-1.60) | 37    | 1.02<br>(0.72-1.40)  |
| Radiotherapy for uveal melanoma             |           |                      |            |                     |            |                     |       |                      |
| Yes                                         | 42        | 1.06<br>(0.76-1.43)  | 16         | 0.82<br>(0.47-1.33) | 10         | 1.23<br>(0.59-2.25) | 68    | 1.01<br>(0.78-1.28)  |
| Site of the next malignancy <sup>c</sup>    |           |                      |            |                     |            |                     |       |                      |
| Breast                                      | 6         | 0.64<br>(0.23-1.39)  | 3          | 0.61<br>(0.13-1.78) | 1          | 0.36<br>(0.01-2.01) | 10    | 0.59<br>(0.28-1.08)  |
| Prostate                                    | 16        | 0.96                 | 5          | 0.60                | 6          | 1.21                | 27    | 0.90                 |

|                         |    |              |   |             |   |              |    |              |
|-------------------------|----|--------------|---|-------------|---|--------------|----|--------------|
|                         |    | (0.55-1.56)  |   | (0.19-1.39) |   | (0.44-2.64)  |    | (0.59-1.31)  |
| Colon and rectum        | 9  | 0.66         | 8 | 1.03        | 5 | 0.97         | 22 | 0.83         |
|                         |    | (0.30-1.26)  |   | (0.45-2.04) |   | (0.32-2.27)  |    | (0.52-1.26)  |
| Lung and bronchus       | 10 | 0.66         | 9 | 1.16        | 1 | 0.23         | 20 | 0.73         |
|                         |    | (0.32-1.22)  |   | (0.53-2.20) |   | (0.01-1.27)  |    | (0.45-1.13)  |
| Urinary bladder         | 6  | 0.91         | 6 | 1.57        | 6 | 2.31         | 18 | 1.38         |
|                         |    | (0.33-1.97)  |   | (0.58-3.41) |   | (0.85-5.02)  |    | (0.82-2.18)  |
| Melanoma of the skin    | 11 | 3.65#        | 2 | 1.17        | 4 | 3.47         | 17 | 2.89#        |
|                         |    | (1.82-6.53)  |   | (0.14-4.21) |   | (0.95-8.88)  |    | (1.68-4.63)  |
| Corpus uteri            | 1  | 0.55         | 2 | 2.30        | 1 | 2.28         | 4  | 1.28         |
|                         |    | (0.01-3.06)  |   | (0.28-8.31) |   | (0.06-12.73) |    | (0.35-3.27)  |
| Non-Hodgkin lymphoma    | 7  | 1.75         | 1 | 0.44        | 0 | 0            | 8  | 1.03         |
|                         |    | (0.70-3.61)  |   | (0.01-2.46) |   |              |    | (0.45-2.04)  |
| Oral cavity and pharynx | 3  | 1.52         | 1 | 0.99        | 0 | 0            | 4  | 1.11         |
|                         |    | (0.31-4.45)  |   | (0.03-5.54) |   |              |    | (0.30-2.84)  |
| Thyroid                 | 2  | 4.16         | 0 | 0           | 0 | 0            | 2  | 2.43         |
|                         |    | (0.50-15.02) |   |             |   |              |    | (0.29-8.78)  |
| Ovary                   | 1  | 0.87         | 0 | 0           | 0 | 0            | 1  | 0.47         |
|                         |    | (0.02-4.84)  |   |             |   |              |    | (0.01-2.61)  |
| Leukemia                | 3  | 0.94         | 3 | 1.61        | 0 | 0            | 6  | 0.94         |
|                         |    | (0.19-2.73)  |   | (0.33-4.72) |   |              |    | (0.35-2.06)  |
| Kidney and renal pelvis | 6  | 2.57         | 0 | 0           | 1 | 1.38         | 7  | 1.64         |
|                         |    | (0.94-5.60)  |   |             |   | (0.03-7.70)  |    | (0.66-3.37)  |
| Eye and orbit           | 2  | 13.6#        | 0 | 0           | 0 | 0            | 2  | 7.40         |
|                         |    | (1.65-49.15) |   |             |   |              |    | (0.90-26.75) |

Acronyms: Obs., Observed; #, significant with P value less than .05; a, using primary site variable, b, using ICD-O-3 histology recode; c, using ICD-O-3 site recode

**Supplementary table 4.** Standardized incidence Ratios for developing a second malignancy after First Primary Uveal Melanoma in **white patients**; SIR (95% confidence intervals)

| Characteristics                                    | < 5 years |                      | 5-10 years |                      | > 10 years |                     | Total |                      |
|----------------------------------------------------|-----------|----------------------|------------|----------------------|------------|---------------------|-------|----------------------|
|                                                    | Obs.      | SIR (95% CI)         | Obs.       | SIR (95% CI)         | Obs.       | SIR (95% CI)        | Obs.  | SIR (95% CI)         |
| Overall                                            | 256       | 1.21#<br>(1.06-1.36) | 180        | 1.10<br>(0.95-1.28)  | 283        | 1.02<br>(0.90-1.14) | 719   | 1.10#<br>(1.02-1.18) |
| <b>Gender</b>                                      |           |                      |            |                      |            |                     |       |                      |
| Male                                               | 152       | 1.20#<br>(1.01-1.40) | 115        | 1.16<br>(0.96-1.39)  | 166        | 0.98<br>(0.83-1.14) | 433   | 1.09<br>(0.99-1.20)  |
| Female                                             | 104       | 1.22<br>(1.00-1.48)  | 65         | 1.02<br>(0.79-1.30)  | 117        | 1.08<br>(0.90-1.30) | 286   | 1.11<br>(0.99-1.25)  |
| <b>Age</b>                                         |           |                      |            |                      |            |                     |       |                      |
| < 50 years                                         | 15        | 1.41<br>(0.79-2.33)  | 20         | 1.46<br>(0.89-2.26)  | 68         | 0.98<br>(0.76-1.24) | 103   | 1.10<br>(0.90-1.33)  |
| 50-69 years                                        | 132       | 1.25#<br>(1.05-1.48) | 112        | 1.15<br>(0.95-1.39)  | 179        | 1.02<br>(0.87-1.18) | 423   | 1.12#<br>(1.01-1.23) |
| 70 years or more                                   | 109       | 1.14<br>(0.93-1.37)  | 48         | 0.92<br>(0.68-1.22)  | 36         | 1.11<br>(0.78-1.54) | 193   | 1.07<br>(0.92-1.23)  |
| <b>Primary site of uveal melanoma <sup>a</sup></b> |           |                      |            |                      |            |                     |       |                      |
| Choroid                                            | 215       | 1.20#<br>(1.05-1.38) | 139        | 1.03<br>(0.87-1.22)  | 216        | 1.01<br>(0.88-1.16) | 570   | 1.08<br>(1.00-1.18)  |
| Ciliary body                                       | 41        | 1.22<br>(0.88-1.66)  | 41         | 1.43#<br>(1.03-1.95) | 67         | 1.04<br>(0.80-1.32) | 149   | 1.18<br>(0.99-1.38)  |
| <b>Histology of uveal melanoma <sup>b</sup></b>    |           |                      |            |                      |            |                     |       |                      |
| 8720/3: Malignant melanoma, NOS                    | 160       | 1.16<br>(0.99-1.36)  | 110        | 1.09<br>(0.90-1.32)  | 174        | 1.10<br>(0.94-1.27) | 444   | 1.12#<br>(1.02-1.23) |
| 8730/3: Amelanotic                                 | 3         | 1.54<br>(0.19-5.58)  | 2          | 1.79<br>(0.22-6.47)  | 2          | 1.44<br>(0.17-5.19) | 6     | 1.58<br>(0.58-3.43)  |
| 8743/3: Superficial spreading                      | 1         | 7.18<br>(0.18-40.01) | 0          | 0                    | 0          | 0                   | 1     | 1.93<br>(0.05-10.77) |
| 8770/3: Mixed epithelioid and spindle cell         | 42        | 1.68#<br>(1.21-2.27) | 13         | 0.72<br>(0.38-1.22)  | 41         | 1.23<br>(0.88-1.66) | 96    | 1.25#<br>(1.02-1.53) |
| 8771/3: Epithelioid                                | 6         | 0.64<br>(0.24-1.40)  | 4          | 0.69<br>(0.19-1.76)  | 7          | 0.78<br>(0.31-1.60) | 17    | 0.70<br>(0.41-1.13)  |
| 8772-8774/3: Spindle cell                          | 45        | 1.17<br>(0.85-1.56)  | 51         | 1.38#<br>(1.02-1.81) | 59         | 0.78<br>(0.60-1.01) | 155   | 1.03<br>(0.87-1.20)  |
| <b>Radiotherapy for uveal melanoma</b>             |           |                      |            |                      |            |                     |       |                      |
| Yes                                                | 102       | 1.13<br>(0.92-1.37)  | 69         | 1.10<br>(0.86-1.40)  | 69         | 1.04<br>(0.81-1.31) | 240   | 1.09<br>(0.96-1.24)  |
| <b>Site of the next malignancy <sup>c</sup></b>    |           |                      |            |                      |            |                     |       |                      |
| Breast                                             | 20        | 0.81<br>(0.49-1.24)  | 17         | 0.93<br>(0.54-1.48)  | 29         | 0.98<br>(0.66-1.41) | 66    | 0.91<br>(0.70-1.15)  |



|                         |    |              |    |              |    |              |     |              |
|-------------------------|----|--------------|----|--------------|----|--------------|-----|--------------|
| Prostate                | 45 | 1.21         | 28 | 0.94         | 46 | 0.92         | 119 | 1.02         |
|                         |    | (0.89-1.62)  |    | (0.63-1.36)  |    | (0.67-1.22)  |     | (0.84-1.22)  |
| Colon and rectum        | 26 | 1.03         | 15 | 0.78         | 27 | 0.85         | 68  | 0.89         |
|                         |    | (0.67-1.51)  |    | (0.44-1.29)  |    | (0.56-1.23)  |     | (0.69-1.13)  |
| Lung and bronchus       | 23 | 0.72         | 30 | 1.23         | 43 | 1.04         | 96  | 0.98         |
|                         |    | (0.46-1.08)  |    | (0.83-1.75)  |    | (0.75-1.40)  |     | (0.79-1.20)  |
| Urinary bladder         | 11 | 0.91         | 11 | 1.14         | 19 | 1.07         | 41  | 1.04         |
|                         |    | (0.45-1.62)  |    | (0.57-2.05)  |    | (0.64-1.67)  |     | (0.74-1.41)  |
| Melanoma of the skin    | 30 | 3.79#        | 12 | 1.94#        | 23 | 1.98#        | 65  | 2.53#        |
|                         |    | (2.56-5.42)  |    | (1.00-3.39)  |    | (1.26-2.97)  |     | (1.95-3.23)  |
| Corpus uteri            | 3  | 0.53         | 6  | 1.51         | 10 | 1.68         | 19  | 1.22         |
|                         |    | (0.11-1.55)  |    | (0.55-3.29)  |    | (0.81-3.09)  |     | (0.73-1.91)  |
| Non-Hodgkin lymphoma    | 12 | 1.44         | 4  | 0.61         | 8  | 0.67         | 24  | 0.89         |
|                         |    | (0.74-2.51)  |    | (0.17-1.57)  |    | (0.29-1.31)  |     | (0.57-1.33)  |
| Oral cavity and pharynx | 6  | 1.10         | 4  | 1            | 3  | 0.48         | 13  | 0.83         |
|                         |    | (0.40-2.40)  |    | (0.27-2.57)  |    | (0.10-1.40)  |     | (0.44-1.42)  |
| Thyroid                 | 7  | 3.24#        | 1  | 0.64         | 3  | 1.19         | 11  | 1.76         |
|                         |    | (1.30-6.67)  |    | (0.02-3.55)  |    | (0.24-3.47)  |     | (0.88-3.14)  |
| Ovary                   | 3  | 1.04         | 1  | 0.48         | 6  | 1.82         | 10  | 1.21         |
|                         |    | (0.21-3.04)  |    | (0.01-2.67)  |    | (0.67-3.95)  |     | (0.58-2.22)  |
| Leukemia                | 5  | 0.82         | 7  | 1.48         | 11 | 1.27         | 23  | 1.18         |
|                         |    | (0.27-1.92)  |    | (0.60-3.05)  |    | (0.63-2.27)  |     | (0.75-1.77)  |
| Kidney and renal pelvis | 14 | 2.48#        | 5  | 1.15         | 11 | 1.44         | 30  | 1.70#        |
|                         |    | (1.36-4.17)  |    | (0.37-2.68)  |    | (0.72-2.57)  |     | (1.15-2.43)  |
| Eye and orbit           | 3  | 8.08#        | 2  | 7.32         | 5  | 10.96#       | 10  | 9.09#        |
|                         |    | (1.67-23.61) |    | (0.89-26.44) |    | (3.56-25.59) |     | (4.36-16.71) |

Acronyms: Obs., Observed; #, significant with P value less than .05; a, using primary site variable, b, using ICD-O-3 histology recode; c, using ICD-O-3 site recode

**Supplementary Table 5.** Standardized incidence ratios for developing a primary uveal melanoma following another primary malignancy in patients **younger than 50 years** at diagnosis of first cancer; SIR (95% confidence intervals)

| Characteristics                                   | < 5 years |                      | 5-10 years |                                    | > 10 years |                     | Total     |                                    |
|---------------------------------------------------|-----------|----------------------|------------|------------------------------------|------------|---------------------|-----------|------------------------------------|
|                                                   | Obs.      | SIR (95% CI)         | Obs.       | SIR (95% CI)                       | Obs.       | SIR (95% CI)        | Obs.      | SIR (95% CI)                       |
| <b>Overall</b>                                    | 7         | 0.80<br>(0.32-1.65)  | <b>18</b>  | <b>1.78#</b><br><b>(1.06-2.82)</b> | 40         | 1.06<br>(0.76-1.45) | 65        | 1.15<br>(0.89-1.47)                |
| <b>Sex</b>                                        |           |                      |            |                                    |            |                     |           |                                    |
| Male                                              | 2         | 0.57<br>(0.07-2.05)  | 5          | 1.25<br>(0.41-2.91)                | 17         | 1.22<br>(0.71-1.95) | 24        | 1.12<br>(0.71-1.66)                |
| Female                                            | 5         | 0.96<br>(0.31-2.23)  | <b>13</b>  | <b>2.14#</b><br><b>(1.14-3.65)</b> | 23         | 0.98<br>(0.62-1.46) | 41        | 1.17<br>(0.84-1.59)                |
| <b>Race</b>                                       |           |                      |            |                                    |            |                     |           |                                    |
| White                                             | 7         | 0.83<br>(0.33-1.70)  | <b>18</b>  | <b>1.83#</b><br><b>(1.09-2.90)</b> | 40         | 1.09<br>(0.78-1.48) | 65        | 1.15<br>(0.89-1.47)                |
| Black                                             | 0         | 0                    | 0          | 0                                  | 0          | 0                   | 0         | 0                                  |
| Other races                                       | 0         | 0                    | 0          | 0                                  | 0          | 0                   | 0         | 0                                  |
| <b>Primary site of uveal melanoma<sup>a</sup></b> |           |                      |            |                                    |            |                     |           |                                    |
| Choroid                                           | 5         | 0.68<br>(0.22-1.59)  | <b>16</b>  | <b>1.84#</b><br><b>(1.05-2.99)</b> | 31         | 0.93<br>(0.63-1.33) | 52        | 1.06<br>(0.79-1.38)                |
| Ciliary body                                      | 2         | 1.43<br>(0.17-5.16)  | 2          | 1.44<br>(0.17-5.19)                | 9          | 2.06<br>(0.94-3.91) | 13        | 1.82<br>(0.97-3.11)                |
| <b>Histology of uveal melanoma<sup>b</sup></b>    |           |                      |            |                                    |            |                     |           |                                    |
| 8720/3: Malignant, NOS                            | 5         | 0.88<br>(0.29-2.06)  | 11         | 1.61<br>(0.80-2.88)                | 32         | 1.16<br>(0.79-1.63) | 48        | 1.20<br>(0.88-1.58)                |
| 8730/3: Amelanotic                                | 0         | 0                    | 0          | 0                                  | 0          | 0                   | 0         | 0                                  |
| 8770/3: Mixed epithelioid and spindle cell        | 0         | 0                    | 1          | 0.89<br>(0.02-4.97)                | 5          | 1.52<br>(0.49-3.55) | 6         | 1.12<br>(0.41-2.43)                |
| 8771/3: Epithelioid cell                          | 0         | 0                    | 1          | 3.65<br>(0.09-20.35)               | 0          | 0                   | 1         | 0.57<br>(0.01-3.15)                |
| 8772-8774/3: Spindle cell                         | 2         | 1.10<br>(0.13-3.99)  | 5          | 2.84<br>(0.92-6.62)                | 3          | 0.60<br>(0.12-1.74) | 10        | 1.16<br>(0.56-2.14)                |
| <b>Site of the first malignancy<sup>c</sup></b>   |           |                      |            |                                    |            |                     |           |                                    |
| Breast                                            | 3         | 1.25<br>(0.26-3.65)  | 7          | 2.46<br>(0.99-5.07)                | 14         | 1.39<br>(0.76-2.34) | <b>24</b> | <b>1.57#</b><br><b>(1.00-2.33)</b> |
| Prostate                                          | 0         | 0                    | 0          | 0                                  | 0          | 0                   | 0         | 0                                  |
| Colon and rectum                                  | 0         | 0                    | 1          | 1.63<br>(0.04-9.09)                | 5          | 2.29<br>(0.74-5.34) | 6         | 1.77<br>(0.65-3.85)                |
| Lung and bronchus                                 | 1         | 4.29<br>(0.11-23.91) | 0          | 0                                  | 1          | 1.78<br>(0.05-9.93) | 2         | 2.04<br>(0.25-7.36)                |
| Urinary bladder                                   | 0         | 0                    | 1          | 2.76<br>(0.07-15.35)               | 2          | 1.25<br>(0.15-4.52) | 3         | 1.34<br>(0.28-3.92)                |
| Melanoma of the skin                              | 3         | 3.03<br>(0.63-8.86)  | 3          | 2.41<br>(0.50-7.03)                | 5          | 0.99<br>(0.32-2.30) | 11        | 1.51<br>(0.75-2.69)                |
| Corpus uteri                                      | 0         | 0                    | 0          | 0                                  | 1          | 0.60<br>(0.02-3.36) | 1         | 0.43<br>(0.01-2.38)                |
| Non-Hodgkin lymphoma                              | 0         | 0                    | 1          | 2.01<br>(0.05-11.18)               | 1          | 0.68<br>(0.02-3.80) | 2         | 0.83<br>(0.10-3.01)                |
| Oral cavity and pharynx                           | 0         | 0                    | 0          | 0                                  | 1          | 0.91<br>(0.02-5.08) | 1         | 0.58<br>(0.01-3.25)                |
| Thyroid                                           | 0         | 0                    | 1          | 1.42<br>(0.04-7.91)                | 2          | 0.69<br>(0.08-2.50) | 3         | 0.71<br>(0.15-2.09)                |
| Ovary                                             | 0         | 0                    | 0          | 0                                  | 1          | 1.13                | 1         | 0.80                               |

|                                              |   |                     |   |                      |    |                      |    |                     |
|----------------------------------------------|---|---------------------|---|----------------------|----|----------------------|----|---------------------|
|                                              |   |                     |   |                      |    | (0.03-6.29)          |    | (0.02-4.44)         |
| Leukemia                                     | 0 | 0                   | 1 | 5.02<br>(0.13-27.98) | 1  | 1.82<br>(0.05-10.15) | 2  | 2.12<br>(0.26-7.67) |
| Kidney and renal pelvis                      | 0 | 0                   | 1 | 3.46<br>(0.09-19.30) | 0  | 0                    | 1  | 0.74<br>(0.02-4.14) |
| Eye and orbit                                | 0 | 0                   | 0 | 0                    | 0  | 0                    | 0  | 0                   |
| <b>Radiotherapy for the first malignancy</b> |   |                     |   |                      |    |                      |    |                     |
| Yes                                          | 1 | 0.36<br>(0.01-2.03) | 4 | 1.31<br>(0.36-3.36)  | 11 | 1.16<br>(0.58-2.08)  | 16 | 1.05<br>(0.60-1.70) |

Acronyms: Obs., Observed; #, significant with P value less than .05; a, using primary site variable, b, using ICD-O-3 histology recode; c, using ICD-O-3 site recode

**Supplementary Table 6.** Standardized incidence ratios for developing a primary uveal melanoma following another primary malignancy in patients between **50-70 years** at diagnosis of first cancer; SIR (95% confidence intervals)

| Characteristics                                    | < 5 years |                      | 5-10 years |                                     | > 10 years |                                     | Total     |                                    |
|----------------------------------------------------|-----------|----------------------|------------|-------------------------------------|------------|-------------------------------------|-----------|------------------------------------|
|                                                    | Obs.      | SIR (95% CI)         | Obs.       | SIR (95% CI)                        | Obs.       | SIR (95% CI)                        | Obs.      | SIR (95% CI)                       |
| <b>Overall</b>                                     | 79        | 1.01<br>(0.80-1.26)  | 74         | 1.15<br>(0.91-1.45)                 | 89         | 1<br>(0.80-1.23)                    | 242       | 1.05<br>(0.92-1.19)                |
| <b>Sex</b>                                         |           |                      |            |                                     |            |                                     |           |                                    |
| Male                                               | 47        | 1.01<br>(0.74-1.35)  | 42         | 1.11<br>(0.80-1.51)                 | 43         | 0.94<br>(0.68-1.27)                 | 132       | 1.02<br>(0.85-1.21)                |
| Female                                             | 32        | 1.01<br>(0.69-1.43)  | 32         | 1.21<br>(0.83-1.71)                 | 46         | 1.06<br>(0.78-1.42)                 | 110       | 1.09<br>(0.89-1.31)                |
| <b>Race</b>                                        |           |                      |            |                                     |            |                                     |           |                                    |
| White                                              | 77        | 1<br>(0.79-1.25)     | 72         | 1.14<br>(0.89-1.44)                 | 87         | 0.99<br>(0.79-1.22)                 | 236       | 1.04<br>(0.91-1.18)                |
| Black                                              | 1         | 2.26<br>(0.06-12.59) | 0          | 0                                   | 1          | 2.41<br>(0.06-13.43)                | 2         | 1.70<br>(0.21-6.15)                |
| Other races                                        | 0         | 0                    | 2          | <b>9.30#</b><br><b>(1.13-33.61)</b> | 1          | 3.29<br>(0.08-18.34)                | 3         | 3.75<br>(0.77-10.95)               |
| <b>Primary site of uveal melanoma <sup>a</sup></b> |           |                      |            |                                     |            |                                     |           |                                    |
| Choroid                                            | 65        | 0.97<br>(0.75-1.23)  | 62         | 1.11<br>(0.85-1.42)                 | 73         | 0.94<br>(0.74-1.19)                 | 200       | 1<br>(0.86-1.15)                   |
| Ciliary body                                       | 14        | 1.31<br>(0.71-2.19)  | 12         | 1.45<br>(0.75-2.52)                 | 16         | 1.38<br>(0.79-2.24)                 | 42        | 1.37<br>(0.99-1.85)                |
| <b>Histology of uveal melanoma <sup>b</sup></b>    |           |                      |            |                                     |            |                                     |           |                                    |
| 8720/3:<br>Malignant, NOS                          | 56        | 1.07<br>(0.81-1.39)  | <b>62</b>  | <b>1.41#</b><br><b>(1.08-1.81)</b>  | 62         | 0.99<br>(0.76-1.27)                 | 180       | 1.13<br>(0.97-1.31)                |
| 8730/3:<br>Amelanotic                              | 0         | 0                    | 0          | 0                                   | <b>3</b>   | <b>5.67#</b><br><b>(1.17-16.56)</b> | 3         | 1.73<br>(0.36-5.07)                |
| 8770/3: Mixed<br>epithelioid and<br>spindle cell   | 12        | 1.32<br>(0.68-2.30)  | 5          | 0.67<br>(0.22-1.57)                 | 11         | 1.05<br>(0.53-1.89)                 | 28        | 1.04<br>(0.69-1.50)                |
| 8771/3:<br>Epithelioid cell                        | 0         | 0                    | 2          | 0.64<br>(0.08-2.32)                 | 2          | 0.49<br>(0.06-1.77)                 | <b>4</b>  | <b>0.36#</b><br><b>(0.10-0.93)</b> |
| 8772-8774/3:<br>Spindle cell                       | 11        | 0.91<br>(0.45-1.63)  | 5          | 0.55<br>(0.18-1.29)                 | 11         | 1<br>(0.50-1.79)                    | 27        | 0.84<br>(0.55-1.22)                |
| <b>Site of the first malignancy <sup>c</sup></b>   |           |                      |            |                                     |            |                                     |           |                                    |
| Breast                                             | 11        | 0.82<br>(0.41-1.46)  | 12         | 0.99<br>(0.51-1.73)                 | 23         | 1.17<br>(0.74-1.76)                 | 46        | 1.02<br>(0.75-1.36)                |
| Prostate                                           | 23        | 1.10<br>(0.69-1.64)  | 22         | 1.17<br>(0.74-1.78)                 | 15         | 0.75<br>(0.42-1.24)                 | 60        | 1.01<br>(0.77-1.29)                |
| Colon and<br>rectum                                | 8         | 0.96<br>(0.41-1.89)  | 11         | 1.59<br>(0.80-2.85)                 | 14         | 1.25<br>(0.68-2.10)                 | 33        | 1.25<br>(0.86-1.75)                |
| Lung and<br>bronchus                               | 2         | 0.23<br>(0.01-1.28)  | 3          | 1.37<br>(0.28-4.01)                 | 3          | 1.35<br>(0.28-3.94)                 | 7         | 0.80<br>(0.32-1.65)                |
| Urinary bladder                                    | 4         | 0.88<br>(0.24-2.26)  | 2          | 0.49<br>(0.06-1.78)                 | 7          | 1.13<br>(0.46-2.33)                 | 13        | 0.88<br>(0.47-1.50)                |
| Melanoma of<br>the skin                            | 6         | 1.63<br>(0.60-3.54)  | 5          | 1.55<br>(0.50-3.61)                 | <b>11</b>  | <b>2.18#</b><br><b>(1.09-3.90)</b>  | <b>22</b> | <b>1.84#</b><br><b>(1.15-2.78)</b> |
| Corpus uteri                                       | 4         | 1.02<br>(0.28-2.61)  | 2          | 0.54<br>(0.07-1.97)                 | 5          | 0.65<br>(0.21-1.51)                 | 11        | 0.72<br>(0.36-1.29)                |
| Non-Hodgkin<br>lymphoma                            | 2         | 0.68<br>(0.08-2.44)  | 1          | 0.45<br>(0.01-2.48)                 | 2          | 0.79<br>(0.10-2.86)                 | 5         | 0.65<br>(0.21-1.51)                |
| Oral cavity and<br>pharynx                         | 4         | 1.69<br>(0.46-4.33)  | 3          | 1.72<br>(0.36-5.03)                 | 1          | 0.45<br>(0.01-2.48)                 | 8         | 1.26<br>(0.54-2.48)                |

|                                              |    |                             |    |                              |    |                        |    |                             |
|----------------------------------------------|----|-----------------------------|----|------------------------------|----|------------------------|----|-----------------------------|
| Thyroid                                      | 5  | <b>4.06#</b><br>(1.32-9.47) | 4  | <b>3.93#</b><br>(1.07-10.06) | 0  | 0                      | 9  | <b>2.38#</b><br>(1.09-4.52) |
| Ovary                                        | 3  | 3.03<br>(0.62-8.84)         | 1  | 1.61<br>(0.04-8.96)          | 2  | 1.88<br>(0.23-6.78)    | 6  | 2.24<br>(0.82-4.87)         |
| Leukemia                                     | 2  | 1.18<br>(0.14-4.25)         | 3  | 2.49<br>(0.51-7.28)          | 0  | 0                      | 5  | 1.21<br>(0.39-2.83)         |
| Kidney and renal pelvis                      | 3  | 1.39<br>(0.29-4.06)         | 1  | 0.60<br>(0.02-3.37)          | 1  | 0.50<br>(0.01-2.77)    | 5  | 0.86<br>(0.28-2.00)         |
| Eye and orbit                                | 0  | 0                           | 0  | 0                            | 1  | 19.43<br>(0.49-108.25) | 1  | 7.32<br>(0.19-40.76)        |
| <b>Radiotherapy for the first malignancy</b> |    |                             |    |                              |    |                        |    |                             |
| Yes                                          | 24 | 1.03<br>(0.66-1.54)         | 16 | 0.88<br>(0.50-1.43)          | 28 | 1.30<br>(0.86-1.88)    | 68 | 1.08<br>(0.84-1.37)         |

Acronyms: Obs., Observed; #, significant with P value less than .05; a, using primary site variable, b, using ICD-O-3 histology recode; c, using ICD-O-3 site recode

**Supplementary Table 7.** Standardized incidence ratios for developing a primary uveal melanoma following another primary malignancy in patients **70 years or more** at diagnosis of first cancer; SIR (95% confidence intervals)

| Characteristics                                   | < 5 years |                                    | 5-10 years |                                    | > 10 years |                       | Total     |                                    |
|---------------------------------------------------|-----------|------------------------------------|------------|------------------------------------|------------|-----------------------|-----------|------------------------------------|
|                                                   | Obs.      | SIR (95% CI)                       | Obs.       | SIR (95% CI)                       | Obs.       | SIR (95% CI)          | Obs.      | SIR (95% CI)                       |
| <b>Overall</b>                                    | 80        | 1.18<br>(0.94-1.47)                | 40         | 1.13<br>(0.81-1.54)                | 14         | 0.78<br>(0.43-1.31)   | 134       | 1.11<br>(0.93-1.31)                |
| <b>Sex</b>                                        |           |                                    |            |                                    |            |                       |           |                                    |
| Male                                              | 47        | 1.10<br>(0.81-1.47)                | 30         | 1.35<br>(0.91-1.93)                | 9          | 0.88<br>(0.40-1.67)   | 86        | 1.15<br>(0.92-1.42)                |
| Female                                            | 33        | 1.33<br>(0.91-1.86)                | 10         | 0.75<br>(0.36-1.39)                | 5          | 0.65<br>(0.21-1.53)   | 48        | 1.05<br>(0.77-1.39)                |
| <b>Race</b>                                       |           |                                    |            |                                    |            |                       |           |                                    |
| White                                             | 80        | 1.20<br>(0.95-1.50)                | 40         | 1.14<br>(0.82-1.56)                | 14         | 0.79<br>(0.43-1.33)   | 134       | 1.12<br>(0.94-1.33)                |
| Black                                             | 0         | 0                                  | 0          | 0                                  | 0          | 0                     | 0         | 0                                  |
| Other races                                       | 0         | 0                                  | 0          | 0                                  | 0          | 0                     | 0         | 0                                  |
| <b>Primary site of uveal melanoma<sup>a</sup></b> |           |                                    |            |                                    |            |                       |           |                                    |
| Choroid                                           | 67        | 1.17<br>(0.91-1.49)                | 33         | 1.09<br>(0.75-1.53)                | 13         | 0.83<br>(0.44-1.42)   | 113       | 1.10<br>(0.90-1.32)                |
| Ciliary body                                      | 13        | 1.24<br>(0.66-2.12)                | 7          | 1.39<br>(0.56-2.86)                | 1          | 0.45<br>(0.01-2.49)   | 21        | 1.18<br>(0.73-1.81)                |
| <b>Histology of uveal melanoma<sup>b</sup></b>    |           |                                    |            |                                    |            |                       |           |                                    |
| 8720/3: Malignant, NOS                            | 49        | 1.10<br>(0.81-1.45)                | 25         | 1.03<br>(0.67-1.52)                | 9          | 0.71<br>(0.32-1.34)   | 83        | 1.02<br>(0.81-1.26)                |
| 8730/3: Amelanotic                                | 1         | 3.24<br>(0.08-18.03)               | 0          | 0                                  | 1          | 10.67<br>(0.27-59.42) | 2         | 3.68<br>(0.45-13.30)               |
| 8770/3: Mixed epithelioid and spindle cell        | 10        | 1.05<br>(0.51-1.94)                | 8          | 1.64<br>(0.71-3.22)                | 3          | 1.35<br>(0.28-3.96)   | 21        | 1.27<br>(0.78-1.93)                |
| 8771/3: Epithelioid cell                          | 6         | 1.82<br>(0.67-3.95)                | 3          | 1.82<br>(0.37-5.31)                | 0          | 0                     | 9         | 1.52<br>(0.70-2.89)                |
| 8772-8774/3: Spindle cell                         | 14        | 1.45<br>(0.79-2.43)                | 4          | 0.89<br>(0.24-2.28)                | 1          | 0.54<br>(0.01-3.01)   | 19        | 1.19<br>(0.71-1.85)                |
| <b>Site of the first malignancy<sup>c</sup></b>   |           |                                    |            |                                    |            |                       |           |                                    |
| Breast                                            | <b>18</b> | <b>1.88#</b><br><b>(1.12-2.98)</b> | 5          | 0.88<br>(0.29-2.05)                | 4          | 1.19<br>(0.32-3.05)   | 27        | 1.45<br>(0.96-2.11)                |
| Prostate                                          | 26        | 1.21<br>(0.79-1.77)                | <b>23</b>  | <b>1.78#</b><br><b>(1.13-2.67)</b> | 7          | 1.11<br>(0.45-2.30)   | <b>56</b> | <b>1.38#</b><br><b>(1.04-1.79)</b> |
| Colon and rectum                                  | 10        | 1.03<br>(0.49-1.89)                | 3          | 0.59<br>(0.12-1.72)                | 2          | 0.70<br>(0.08-2.53)   | 15        | 0.85<br>(0.47-1.40)                |
| Lung and bronchus                                 | 3         | 0.82<br>(0.17-2.40)                | 0          | 0                                  | 0          | 0                     | 3         | 0.61<br>(0.12-1.77)                |
| Urinary bladder                                   | 8         | 1.50<br>(0.65-2.95)                | 3          | 1.11<br>(0.23-3.23)                | 0          | 0                     | 11        | 1.18<br>(0.59-2.12)                |
| Melanoma of the skin                              | 2         | 0.85<br>(0.10-3.06)                | 2          | 1.64<br>(0.20-5.92)                | 1          | 1.65<br>(0.04-9.17)   | 5         | 1.19<br>(0.39-2.79)                |
| Corpus uteri                                      | 4         | 2.06<br>(0.56-5.27)                | 0          | 0                                  | 0          | 0                     | 4         | 0.98<br>(0.27-2.50)                |
| Non-Hodgkin lymphoma                              | 3         | 1.19<br>(0.25-3.49)                | 1          | 0.89<br>(0.02-4.97)                | 0          | 0                     | 4         | 0.99<br>(0.27-2.53)                |
| Oral cavity and pharynx                           | 1         | 0.75<br>(0.02-4.17)                | 0          | 0                                  | 0          | 0                     | 1         | 0.45<br>(0.01-2.51)                |
| Thyroid                                           | 0         | 0                                  | 0          | 0                                  | 0          | 0                     | 0         | 0                                  |
| Ovary                                             | 2         | 3.73                               | 0          | 0                                  | 0          | 0                     | 2         | 2.38                               |

|                                              |    |                     |    |                      |   |                     |    |                       |
|----------------------------------------------|----|---------------------|----|----------------------|---|---------------------|----|-----------------------|
|                                              |    | (0.45-13.48)        |    |                      |   |                     |    | (0.29-8.58)           |
| Leukemia                                     | 0  | 0                   | 2  | 3.06<br>(0.37-11.04) | 0 | 0                   | 2  | 0.79<br>(0.10-2.87)   |
| Kidney and renal pelvis                      | 0  | 0                   | 1  | 1.43<br>(0.04-7.98)  | 0 | 0                   | 1  | 0.41<br>(0.01-2.27)   |
| Eye and orbit                                | 1  | 22.26<br>(0.56-124) | 0  | 0                    | 0 | 0                   | 1  | 13.20<br>(0.33-73.55) |
| <b>Radiotherapy for the first malignancy</b> |    |                     |    |                      |   |                     |    |                       |
| Yes                                          | 19 | 1.06<br>(0.64-1.65) | 12 | 1.18<br>(0.61-2.05)  | 7 | 1.43<br>(0.57-2.94) | 38 | 1.15<br>(0.81-1.57)   |

Acronyms: Obs., Observed; #, significant with P value less than .05; a, using primary site variable, b, using ICD-O-3 histology recode; c, using ICD-O-3 site recode

**Supplementary Table 8.** Standardized incidence ratios for developing a primary uveal melanoma following another primary malignancy in white patients; SIR (95% confidence intervals)

| Characteristics                                   | < 5 years |                     | 5-10 years |                                    | > 10 years |                                     | Total     |                                    |
|---------------------------------------------------|-----------|---------------------|------------|------------------------------------|------------|-------------------------------------|-----------|------------------------------------|
|                                                   | Obs.      | SIR (95% CI)        | Obs.       | SIR (95% CI)                       | Obs.       | SIR (95% CI)                        | Obs.      | SIR (95% CI)                       |
| <b>Overall</b>                                    | 164       | 1.08<br>(0.92-1.26) | <b>130</b> | <b>1.20#</b><br><b>(1.01-1.43)</b> | 141        | 0.99<br>(0.83-1.17)                 | 435       | 1.08<br>(0.98-1.19)                |
| <b>Sex</b>                                        |           |                     |            |                                    |            |                                     |           |                                    |
| Male                                              | 95        | 1.04<br>(0.85-1.28) | 77         | 1.23<br>(0.97-1.53)                | 69         | 1<br>(0.78-1.27)                    | 241       | 1.08<br>(0.95-1.23)                |
| Female                                            | 69        | 1.13<br>(0.88-1.44) | 53         | 1.18<br>(0.88-1.54)                | 72         | 0.98<br>(0.77-1.23)                 | 194       | 1.08<br>(0.93-1.24)                |
| <b>Age at diagnosis at the first malignancy</b>   |           |                     |            |                                    |            |                                     |           |                                    |
| <50 years                                         | 7         | 0.83<br>(0.33-1.70) | <b>18</b>  | <b>1.83#</b><br><b>(1.09-2.90)</b> | 40         | 1.09<br>(0.78-1.48)                 | 65        | 1.18<br>(0.91-1.50)                |
| 50-70 years                                       | 77        | 1<br>(0.79-1.25)    | 72         | 1.14<br>(0.89-1.44)                | 87         | 0.99<br>(0.79-1.22)                 | 236       | 1.04<br>(0.91-1.18)                |
| 70 years or more                                  | 80        | 1.20<br>(0.95-1.50) | 40         | 1.14<br>(0.82-1.56)                | 14         | 0.79<br>(0.43-1.33)                 | 134       | 1.12<br>(0.94-1.33)                |
| <b>Primary site of uveal melanoma<sup>a</sup></b> |           |                     |            |                                    |            |                                     |           |                                    |
| Choroid                                           | 135       | 1.04<br>(0.87-1.23) | 110        | 1.18<br>(0.97-1.42)                | 115        | 0.92<br>(0.76-1.11)                 | 360       | 1.04<br>(0.93-1.15)                |
| Ciliary body                                      | 29        | 1.31<br>(0.87-1.88) | 20         | 1.38<br>(0.84-2.13)                | 26         | 1.45<br>(0.95-2.13)                 | <b>75</b> | <b>1.37#</b><br><b>(1.08-1.72)</b> |
| 8720/3: Malignant, NOS                            | 108       | 1.07<br>(0.88-1.29) | <b>97</b>  | <b>1.31#</b><br><b>(1.06-1.60)</b> | 101        | 0.99<br>(0.81-1.21)                 | 306       | 1.11<br>(0.99-1.24)                |
| 8730/3: Amelanotic                                | 1         | 0.94<br>(0.02-5.25) | 0          | 0                                  | <b>4</b>   | <b>4.27#</b><br><b>(1.16-10.93)</b> | 5         | 1.84<br>(0.60-4.29)                |
| 8770/3: Mixed epithelioid and spindle cell        | 22        | 1.15<br>(0.72-1.74) | 13         | 0.98<br>(0.52-1.68)                | 19         | 1.21<br>(0.73-1.88)                 | 54        | 1.12<br>(0.84-1.46)                |
| 8771/3: Epithelioid cell                          | 6         | 0.85<br>(0.31-1.84) | 6          | 1.23<br>(0.45-2.67)                | 2          | 0.32<br>(0.01-1.17)                 | 14        | 0.77<br>(0.42-1.30)                |
| 8772-8774/3: Spindle cell                         | 27        | 1.16<br>(0.76-1.69) | 14         | 0.92<br>(0.51-1.55)                | 15         | 0.85<br>(0.47-1.39)                 | 56        | 1<br>(0.75-1.29)                   |
| <b>Site of the first malignancy<sup>c</sup></b>   |           |                     |            |                                    |            |                                     |           |                                    |
| Breast                                            | 32        | 1.28<br>(0.87-1.80) | 23         | 1.13<br>(0.72-1.69)                | 39         | 1.20<br>(0.85-1.63)                 | 94        | 1.20<br>(0.97-1.47)                |
| Prostate                                          | 49        | 1.17<br>(0.87-1.55) | <b>45</b>  | <b>1.43#</b><br><b>(1.04-1.91)</b> | 22         | 0.84<br>(0.52-1.27)                 | 116       | 1.16<br>(0.96-1.40)                |
| Colon and rectum                                  | 18        | 0.98<br>(0.58-1.54) | 15         | 1.21<br>(0.68-1.99)                | 21         | 1.31<br>(0.81-2.00)                 | 54        | 1.15<br>(0.87-1.50)                |
| Lung and bronchus                                 | 5         | 0.62<br>(0.20-1.44) | 3          | 0.90<br>(0.19-2.64)                | 4          | 1.30<br>(0.36-3.34)                 | 12        | 0.83<br>(0.43-1.45)                |
| Urinary bladder                                   | 12        | 1.19<br>(0.62-2.09) | 6          | 0.85<br>(0.31-1.84)                | 9          | 1.01<br>(0.46-1.91)                 | 27        | 1.04<br>(0.68-1.51)                |
| Melanoma of the skin                              | 11        | 1.59<br>(0.79-2.85) | 10         | 1.78<br>(0.86-3.28)                | 17         | 1.62<br>(0.94-2.59)                 | <b>38</b> | <b>1.65#</b><br><b>(1.17-2.26)</b> |
| Corpus uteri                                      | 8         | 1.31<br>(0.57-2.59) | 2          | 0.38<br>(0.05-1.38)                | 6          | 0.59<br>(0.22-1.28)                 | 16        | 0.74<br>(0.43-1.21)                |
| Non-Hodgkin lymphoma                              | 5         | 0.86<br>(0.28-2.01) | 3          | 0.79<br>(0.16-2.30)                | 3          | 0.69<br>(0.14-2.02)                 | 11        | 0.79<br>(0.39-1.41)                |
| Oral cavity and pharynx                           | 4         | 1.02<br>(0.28-2.60) | 3          | 1.14<br>(0.23-3.23)                | 2          | 0.56<br>(0.07-2.03)                 | 9         | 0.89<br>(0.41-1.69)                |
| Thyroid                                           | 5         | 2.28                | 4          | 2.10                               | 2          | 0.45                                | 11        | 1.29                               |



|                                              |    |                       |          |                                    |    |                      |     |                      |
|----------------------------------------------|----|-----------------------|----------|------------------------------------|----|----------------------|-----|----------------------|
|                                              |    | (0.74-5.32)           |          | (0.57-5.38)                        |    | (0.05-1.62)          |     | (0.64-2.30)          |
| Ovary                                        | 5  | 2.96<br>(0.96-6.91)   | 1        | 1.01<br>(0.03-5.64)                | 3  | 1.47<br>(0.30-4.30)  | 9   | 1.91<br>(0.87-3.62)  |
| Leukemia                                     | 2  | 0.58<br>(0.07-2.08)   | <b>6</b> | <b>2.96#</b><br><b>(1.09-6.44)</b> | 1  | 0.51<br>(0.01-2.82)  | 9   | 1.20<br>(0.55-2.29)  |
| Kidney and renal pelvis                      | 2  | 0.52<br>(0.06-1.88)   | 3        | 1.15<br>(0.24-3.37)                | 1  | 0.33<br>(0.01-1.83)  | 6   | 0.63<br>(0.23-1.38)  |
| Eye and orbit                                | 1  | 10.15<br>(0.26-56.53) | 0        | 0                                  | 1  | 9.81<br>(0.25-54.68) | 2   | 7.50<br>(0.91-27.10) |
| <b>Radiotherapy for the first malignancy</b> |    |                       |          |                                    |    |                      |     |                      |
| Yes                                          | 43 | 0.99<br>(0.72-1.34)   | 32       | 1.03<br>(0.71-1.46)                | 46 | 1.30<br>(0.95-1.73)  | 121 | 1.10<br>(0.91-1.32)  |

Acronyms: Obs., Observed; #, significant with P value less than .05; a, using primary site variable, b, using ICD-O-3 histology recode; c, using ICD-O-3 site recode

**Supplementary Table 9.** Standardized incidence Ratios for developing a second malignancy after First Primary Uveal Melanoma according to latency; SIR (95% confidence intervals) (A complimentary to **Table 4**)

| <b>Histology of uveal melanoma<sup>a</sup></b> |           |                                    |           |                                    |     |                     |            |                                    |
|------------------------------------------------|-----------|------------------------------------|-----------|------------------------------------|-----|---------------------|------------|------------------------------------|
| 8720/3:<br>Malignant melanoma, NOS             | 161       | 1.15<br>(0.98-1.34)                | 111       | 1.09<br>(0.89-1.31)                | 177 | 1.09<br>(0.93-1.26) | <b>449</b> | <b>1.11#</b><br><b>(1.01-1.22)</b> |
| 8730/3:<br>Amelanotic                          | 2         | 1.45<br>(0.18-5.25)                | 2         | 1.73<br>(0.21-6.26)                | 2   | 1.42<br>(0.17-5.13) | 6          | 1.52<br>(0.56-3.32)                |
| 8743/3:<br>Superficial spreading               | 1         | 7.18<br>(0.18-40.01)               | 0         | 0                                  | 0   | 0                   | 1          | 1.93<br>(0.05-10.77)               |
| 8770/3: Mixed epithelioid and spindle cell     | <b>42</b> | <b>1.66#</b><br><b>(1.20-2.24)</b> | 13        | 0.71<br>(0.38-1.21)                | 42  | 1.25<br>(0.90-1.69) | <b>97</b>  | <b>1.26#</b><br><b>(1.02-1.53)</b> |
| 8771/3:<br>Epithelioid                         | 7         | 0.74<br>(0.295-1.51)               | 4         | 0.68<br>(0.184-1.733)              | 7   | 0.78<br>(0.31-1.60) | 18         | 0.74<br>(0.44-1.16)                |
| 8772-8774/3:<br>Spindle cell                   | 45        | 1.15<br>(0.84-1.54)                | <b>51</b> | <b>1.36#</b><br><b>(1.01-1.79)</b> | 59  | 0.78<br>(0.59-1.00) | 155        | 1.02<br>(0.86-1.19)                |
| <b>Radiotherapy for uveal melanoma</b>         |           |                                    |           |                                    |     |                     |            |                                    |
| Yes                                            | 103       | 1.12<br>(0.91-1.36)                | 70        | 1.10<br>(0.86-1.39)                | 70  | 1.03<br>(0.80-1.30) | 243        | 1.09<br>(0.95-1.23)                |

Acronyms: a, using ICD-O-3 histology recode

**Supplementary Table 10.** Standardized incidence ratios for developing a primary uveal melanoma following another primary malignancy according to the latency; SIR (95% confidence intervals). (A complimentary to **Table 5**)

| Histology of uveal melanoma <sup>a</sup>         |     |                     |    |                      |     |                       |     |                     |
|--------------------------------------------------|-----|---------------------|----|----------------------|-----|-----------------------|-----|---------------------|
| 8720/3:<br>Malignant, NOS                        | 110 | 1.07<br>(0.88-1.29) | 98 | 1.31#<br>(1.06-1.59) | 103 | 1.00<br>(0.82-1.21)   | 311 | 1.11<br>(0.99-1.24) |
| 8730/3:<br>Amelanotic                            | 1   | 0.92<br>(0.02-5.13) | 0  | 0                    | 4   | 4.22#<br>(1.15-10.81) | 5   | 1.81<br>(0.59-4.22) |
| 8770/3: Mixed<br>epithelioid and<br>spindle cell | 22  | 1.13<br>(0.71-1.70) | 14 | 1.04<br>(0.57-1.75)  | 19  | 1.19<br>(0.72-1.86)   | 55  | 1.12<br>(0.85-1.46) |
| 8771/3:<br>Epithelioid cell                      | 6   | 0.82<br>(0.30-1.78) | 6  | 1.19<br>(0.44-2.59)  | 2   | 0.32<br>(0.04-1.15)   | 14  | 0.75<br>(0.41-1.26) |
| 8772-8774/3:<br>Spindle cell                     | 27  | 1.15<br>(0.76-1.67) | 14 | 0.92<br>(0.50-1.54)  | 15  | 0.84<br>(0.47-1.38)   | 56  | 0.99<br>(0.75-1.28) |

Acronyms: a, using ICD-O-3 histology recode
